# Supplementary material
Source: PubMed Central journal article supplement (PMC7043233)
Supplement: NIHMS1555584-supplement-Supplementary_Figure_and_Legend.pdf [file NIHMS1555584-supplement-Supplementary_Figure_and_Legend.pdf]

# Effects of Gamma Radiation Sterilization on the Structural and Biological Properties of Decellularized Corneal Xenografts

Mohammad Mirazul Islam<sup>a</sup>, Roholah Sharifi<sup>a</sup>, Shamina Mamodaly<sup>a</sup>, Rakibul Islam<sup>b</sup>, Daniel Nahra<sup>a</sup>, Dina B. Abusamra<sup>a</sup>, Pui Chuen Hui<sup>a</sup>, Yashar Adibnia<sup>a,c</sup>, Mehdi Goulamaly<sup>d</sup>, Eleftherios I. Paschalis<sup>a</sup>, Andrea Cruzat<sup>a,e</sup>, Jing Kong<sup>d</sup>, Per H. Nilsson<sup>b,f</sup>, Pablo Argüeso<sup>a</sup>, Tom Eirik Mollnes<sup>b,g,h</sup>, James Chodosh<sup>a</sup>, Claes H. Dohlman<sup>a</sup>, Miguel Gonzalez-Andrades<sup>a,i,\*</sup>

## Supplementary Materials

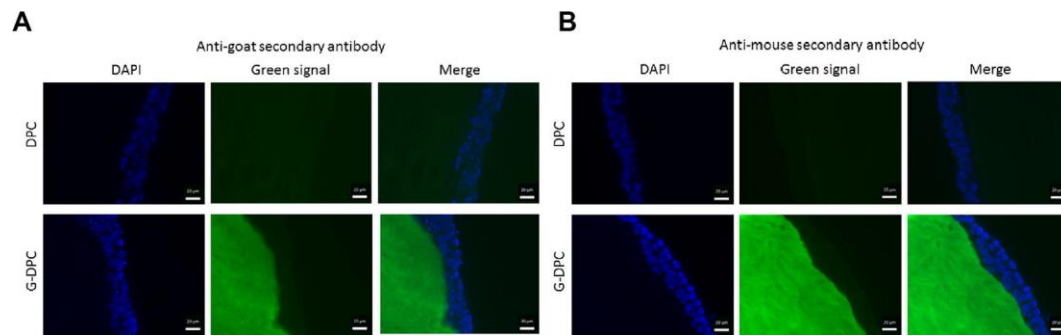

Fig. S1. HCEC grown on decellularized porcine cornea (DPC) and gamma irradiated decellularized porcine cornea (G-DPC) stained with: (A) anti-goat only secondary antibody, and (B) anti-mouse only secondary antibody. Negative staining did not showed any green fluorescence staining in the epithelial region. Nuclei were stained with DAPI (blue). Scale bars: 20  $\mu\text{m}$ .
